# Supplementary material for: Bone-like peptide/hydroxyapatite nanocomposites assembled with multi-level hierarchical structures
Source: Royal Society of Chemistry journal article supplement (doi:10.1039/c1sm05307h), 2011-01-01
Supplement: c1sm05307h.pdf [file c1sm05307h.pdf]

## Electronic Supplementary Information (ESI)

### Bone-Like Peptide/Hydroxyapatite Nanocomposites Assembled with Multi-Level Hierarchical Structures

Jungki Ryu, Sook Hee Ku, Minah Lee, and Chan Beum Park\*

<sup>1</sup>*Department of Materials Science and Engineering, Korea Advanced Institute of Science and Technology (KAIST), 335 Science Road, Daejeon 305-701, Republic of Korea*

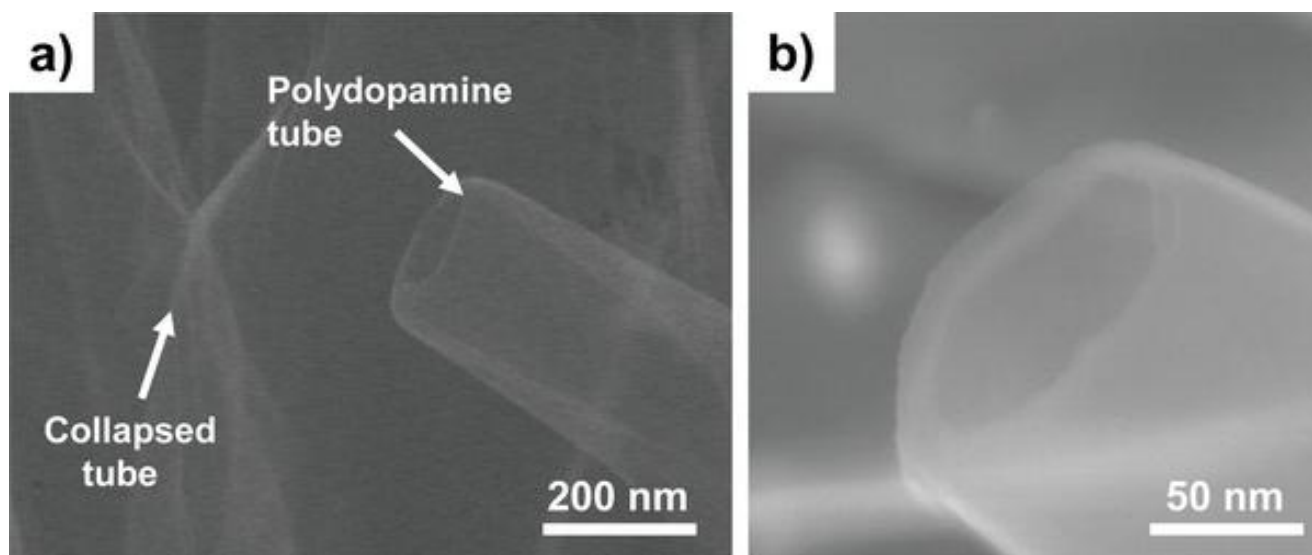

**Figure S1.** SEM micrographs of polydopamine nanotubes demonstrating the preferential growth of polydopamine along the side wall of peptide nanowires. Peptide nanowires were coated with polydopamine by incubating in a  $2 \text{ mg mL}^{-1}$  dopamine solution for 16 h. Polydopamine-coated peptide nanowires were then annealed at  $300 \text{ }^\circ\text{C}$  to selectively remove the peptide nanowires. By measuring the wall-thickness of polydopamine nanotubes, we could also indirectly estimate the thickness of polydopamine layer grown along the peptide nanowires.

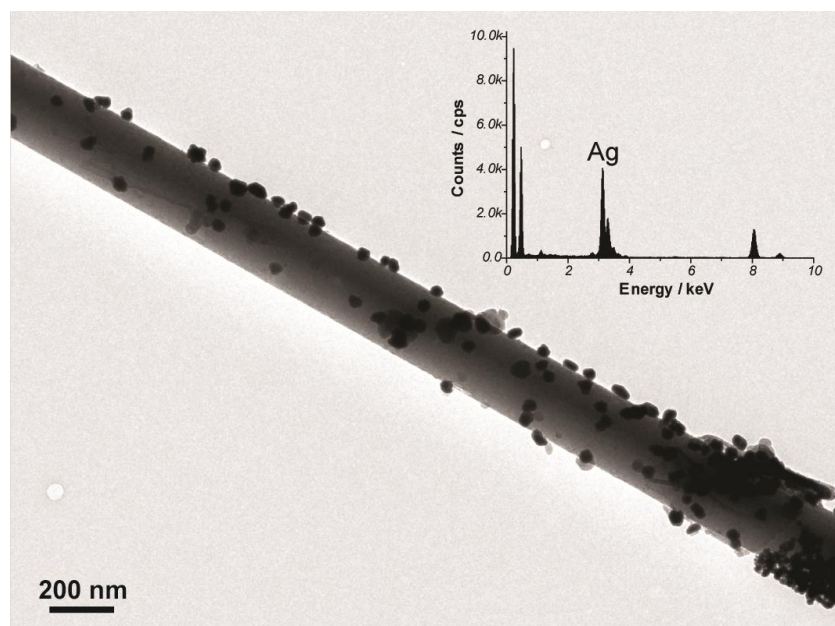

**Figure S2.** A TEM image and EDS spectrum of polydopamine-coated peptide nanowires after incubation in 0.1 M AgNO<sub>3</sub> solution for 2 h. Because of the reducing power of polydopamine (Y. Fu et al., *Adv. Funct. Mater.* **2009**, *19*, 1784-1791), Ag nanoparticles formed along the polydopamine-coated peptide nanowires even without reducing agents.

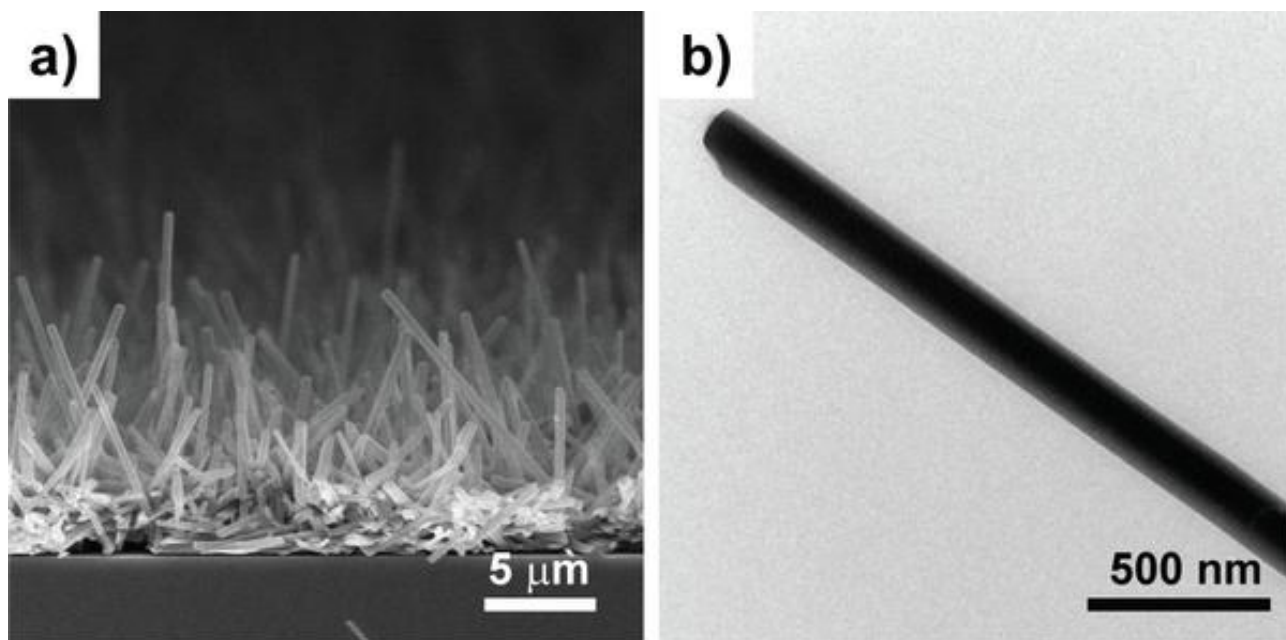

**Figure S3.** SEM (a) and TEM (b) micrographs of peptide nanowires after incubation in 1.5× SBF at 37 °C for a week. It was found that pristine peptide nanowires (without polydopamine coating) have no biomineralization activity.

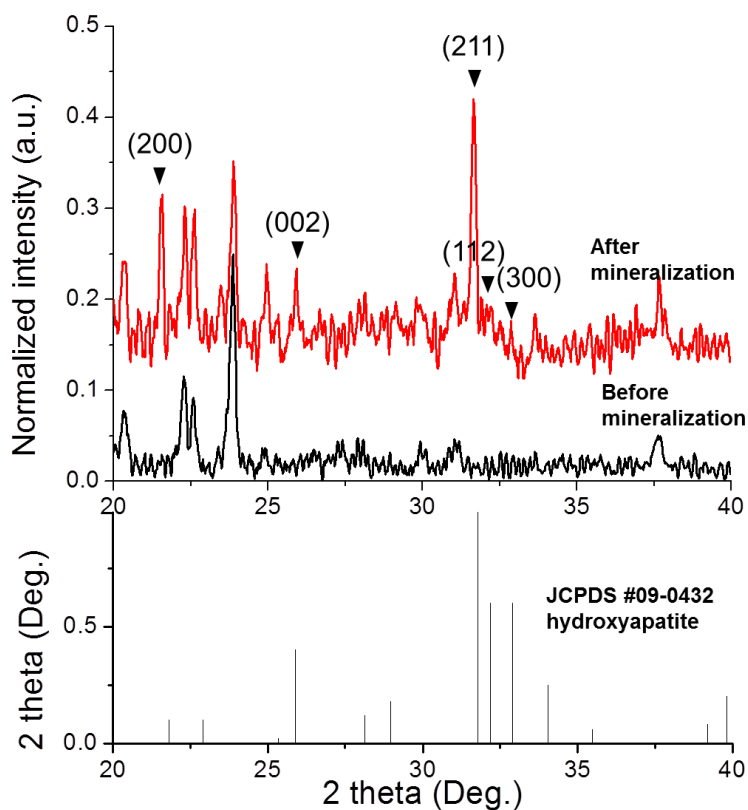

**Figure S4.** XRD diffraction patterns of polydopamine-coated peptide nanowires before and after two days of biom mineralization in  $1.5\times$  SBF at  $37\text{ }^{\circ}\text{C}$ . It was found that calcium phosphate minerals grown along the polydopamine-coated peptide nanowires are hydroxyapatite, rather than other calcium phosphate crystals such as octacalcium phosphate and dicalcium phosphate.

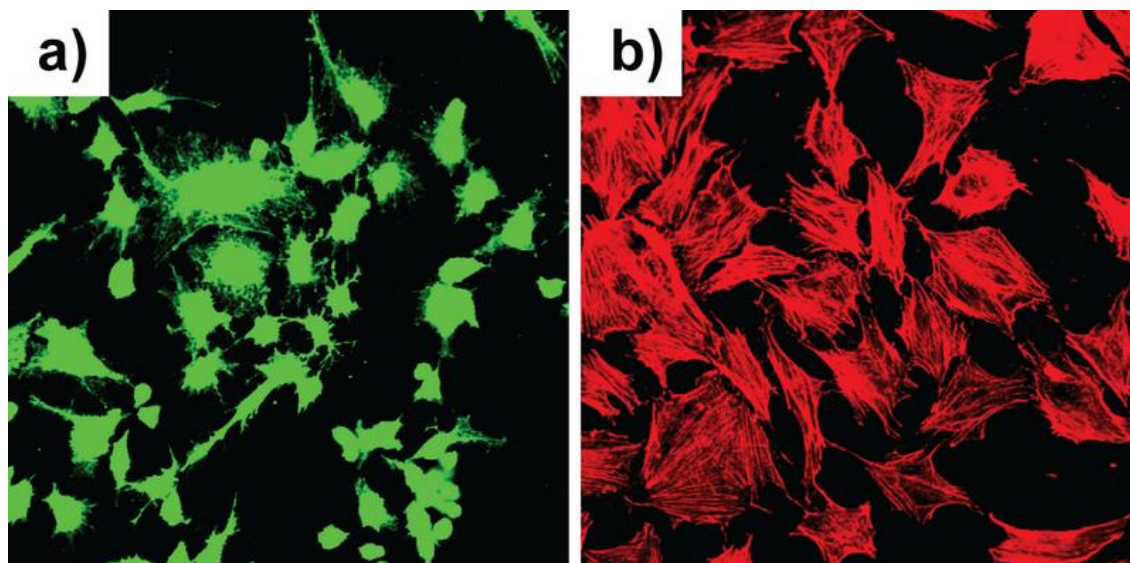

**Figure S5.** Fluorescent micrographs of preosteoblast (MC3T3-E) cultured on glass substrate showing polygonal morphology. (a) Live/Dead cell assay; (b) actin-filament staining with rhodamine-phalloidin.
